# Supplementary material
Source: Frontiers journal article supplement (https://www.frontiersin.org/articles/525381)
Supplement: Data_Sheet_3.PDF [file Data_Sheet_3.PDF]

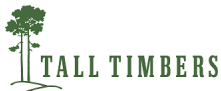

Jim Cox &lt;jcox@talltimbers.org&gt;

---

**Pers Comm validation**

---

**Rick Anderson** <woodsburner@mac.com>

Wed, Jul 8, 2020 at 11:51 AM

To: Jim Cox &lt;jcox@talltimbers.org&gt;

> Jim  
>  
> I've looked over the personal comments you've extracted from the conversation we had last year and placed in your draft article called "Interpreting Smoke Signals: Fire Ecology and Land Management for Four Federally Listed Birds". The comments attributed to me accurately reflect the information I provided based on my tenure as the Fire Management Officer at Everglades National Park. I hope to see the article in Frontiers in Ecology and Evolution soon.  
>  
> Sincerely,  
> Rick Anderson
